# Supplementary material for: MicroRNA-29b/Tet1 regulatory axis epigenetically modulates mesendoderm differentiation in mouse embryonic stem cells
Source: PubMed Central journal article supplement — Nucleic Acids Res. 2015 Jun 30;43(16):7805–22. doi: 10.1093/nar/gkv653 (PMC4652748; doi:10.1093/nar/gkv653), 2015-06-30

Primer list for qPCR

| gene         | Forward                   | Reverse                   |
|--------------|---------------------------|---------------------------|
| Pou5f1(Oct4) | CGTGGAGACTTTGCAGCCT       | GCTTGGCAAACCTGTTCTAGCTC   |
| Sox2         | GAGTGGAAACTTTTGTCCGAGA    | GAAGCGTGTACTTATCCTTCTTCAT |
| Klf4         | CGAACTCACACAGGCGAGAA      | CGGAGCGGGCGAATTT          |
| Nanog        | AACCAAAGGATGAAGTGCAAGTG   | TCCAAGTTGGGTTGGTCCAA      |
| Nodal        | GCTCCTGGATCATCTACCCC      | ACCCTGCCATTGTCCACATA      |
| T            | CTGGGAGCTCAGTTCTTTTCTGA   | GAGGACGTGGCAGCTGAGA       |
| Gata6        | TGCTTGCGGGCTCTATATGA      | AGGTGGTCGCTTGTGTAGAA      |
| Foxa2        | TTTTGTTTGGGGAGACAAGG      | GTGGGATGACTTCAGGAGGA      |
| Pax6         | ATCTGCTACTTCCCCCGAG       | CTCACACATCTGCTCACCGC      |
| Nestin       | TCCCTTAGTCTGGAAGTGGCTA    | GGTGTCTGCAAGCGAGAGTT      |
| Sma          | GCTATTCAGGCTGTGCTGTC      | GGTAGTCGGTGAGATCTCGG      |
| Gata4        | TCCTACTCCAGCCCCTACC       | GTAGTGTCCCGTCCCATCTC      |
| Sox17        | GTGCCAGGCTTCTAGTCCAG      | CGAGCTCACGACGTTATCAA      |
| Tet1         | GCTGGATTGAAGGAACAGGA      | GTCTCCATGAGCTCCCTGAC      |
| Tet2         | AACCTGGCTACTGTCAATTGCTCCA | ATGTTCTGCTGGTCTCTGTGGGAA  |
| Tet3         | TCCGGATTGAGAAGGTCATC      | CCAGGCCAGGATCAAGATAA      |
| Tdg          | CAAGAGGACGCAAAGAAGATGG    | TTGAAGCAATGCCACAAGGTT     |
| Lefty1       | TCGATTCTAGGCTCGTGTCC      | ACGAACCAACTTGTGTGAGC      |
| Lefty2       | CACAAGTTGGTCCGTTTTCG      | GGTACCTCGGGGTCACAAT       |
| GAPDH        | GTGTTCTACCCCCAATGTGT      | ATTGTCATACCAGGAAATGAGCTT  |
| U6           | CTCGCTTCGGCAGCACAA        | AACGCTTCACGAATTTGCGT      |

shRNA sequence

| gene | Forward                                                     | Reverse                                                       |
|------|-------------------------------------------------------------|---------------------------------------------------------------|
| Tet1 | GATCCCCCAACTTGCATCCACGATTATCAAGAGATAATCGTGGATGCAAGTTGTTTTTC |                                                               |
| Tet2 | GATCCCCACTACTAACTCCACCCTAATCAAGAGATTAGGGTGGAGTTAGTAGTTTTTC  |                                                               |
|      |                                                             | Reverse                                                       |
| Tet1 |                                                             | TCGAGAAAAACAACCTTGCATCCACGATTATCTCTTGAATAATCGTGGATGCAAGTTGGGG |
| Tet2 |                                                             | TCGAGAAAAACTACTAACTCCACCCTAATCTCTTGAATTAGGGTGGAGTTAGTAGTGGG   |

Primer for GLIP-PCR

|           | Forward              | Reverse              |
|-----------|----------------------|----------------------|
| Lefty1 1# | GCTGCAGACTTCATTCCAGG | TAAGACTCGTCCCTGGTGTG |
| Lefty1 2# | CTTCTGTTCCATTGCAGTGT | TTTCTTGGCTCGAGACCAGT |
| Lefty1 3# | GCCTCACTTTATCAGCCCT  | GAGGTCTCACGTTCTCTGCT |
| Lefty1 4# | ACCCACCTTCCATCCCATG  | TGGTCACCGCTGTCTGTTAG |
| Lefty2 1# | CTGTGGCCATTGTTACCTC  | GGTCAGCTCACTACAGGACA |
| Lefty2 2# | CGATGGATGTCTGCTGAGGA | CCCAGTTTACAACAGCTGGG |
| Lefty2 3# | AGAGAGACATGCGCAGTCTT | TACCCCGGAGTCAAAGGAAC |
| Lefty2 4# | AAGAATTCAGCCCAGCCATG | GGAAGACACACGGACTGAGA |

Figure S1. MiR-29b expression level after miR-29b mimic transfection 48h in mESCs by qPCR.

Figure S2. Tet1 and Tet2 siRNA KD efficiency validation by qPCR.

Figure S3. (A) Bioinformatics software prediction results show top 10 potential miRNAs that targets all three Tet family members. (B) qRT-PCR results of Oct4, Sox2, Nanog and Klf4 expression level in mESCs, EB and MEF. Each bar represents the mean  $\pm$  SEM of triplicates. (C) The expression patterns of other miRNAs (potential miRNA that may targets Tet family) during ESCs differentiation.

Figure S4. Validation of Tet1 and Tet2 KD mESCs by qPCR.

Figure S5. (A) ALP activity detection in Tet2 KD mESCs. (B) Oct4, Sox2 and Nanog weren't affected in Tet2 KD mESCs. (C) Different germ layer markers expression level in Tet2 KD mESCs.

Figure S6. Schematic picture to show the role of miR-29/Tet1 axis in mESCs.

**Figure S1**

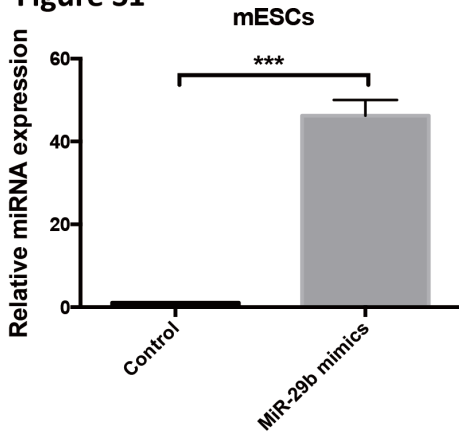

**Figure S2**

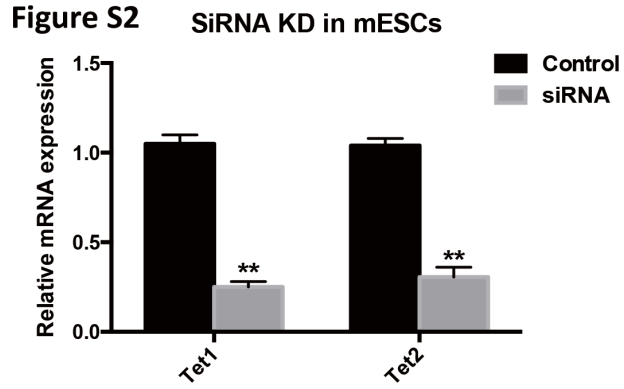

**Figure S3**

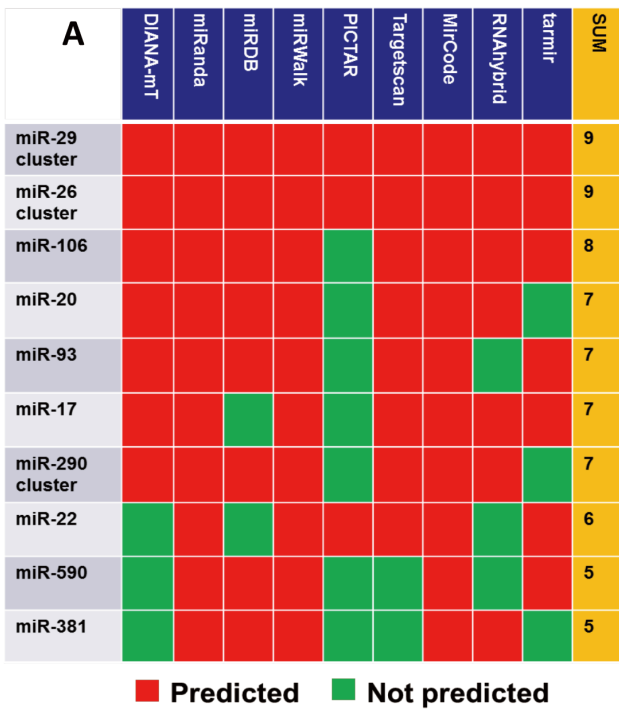

**C**

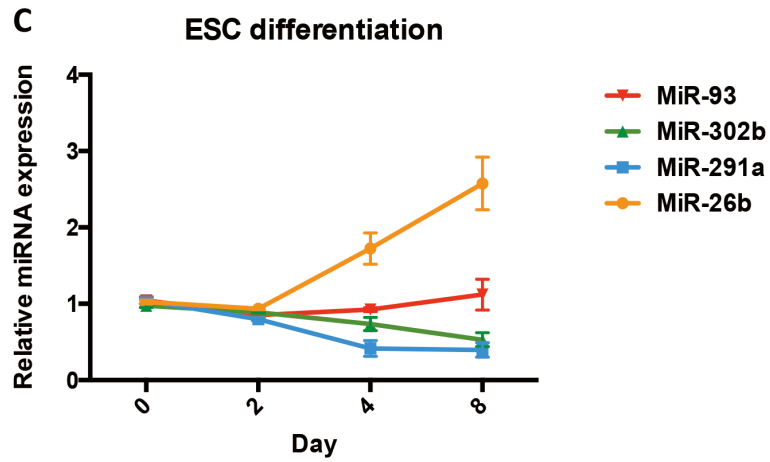

**Figure S4** shRNA KD in mESCs

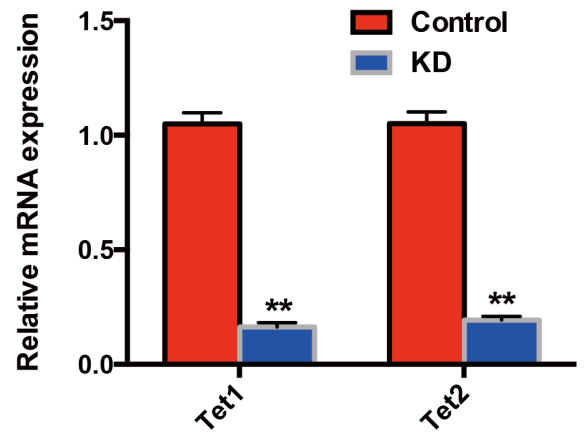

**Figure S5**

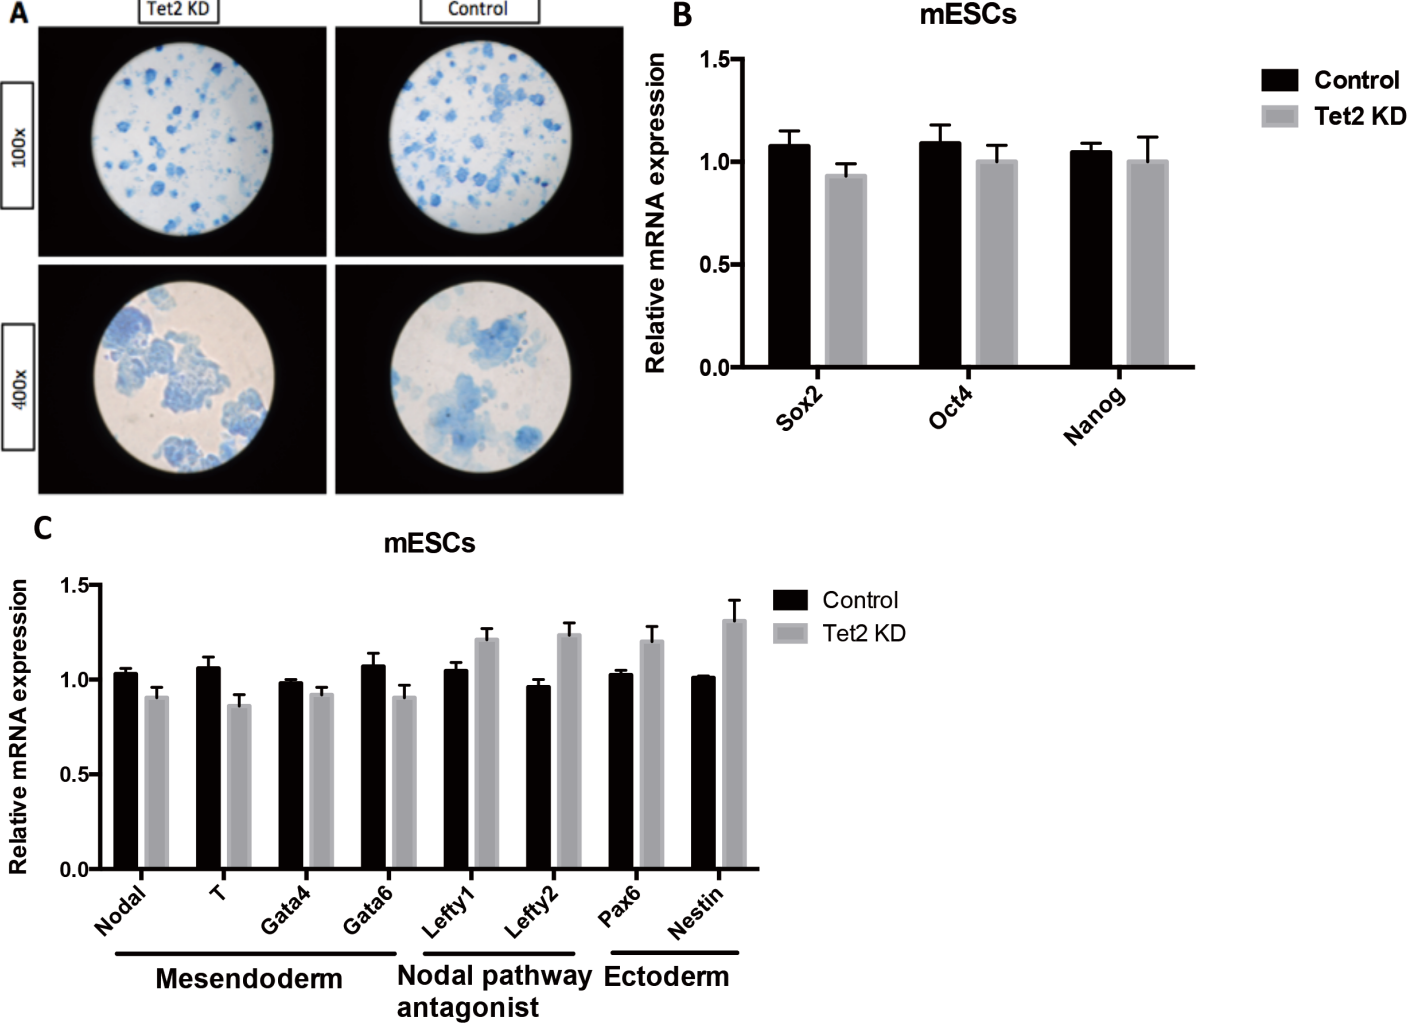

**Figure S6**

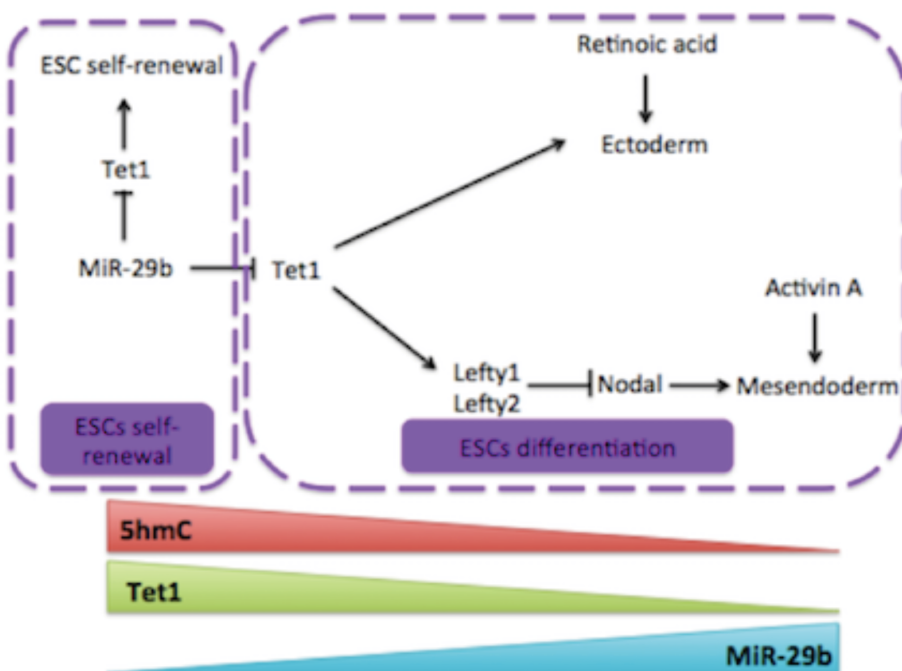

Supplement: supp_gkv653_nar-00868-x-2015-File012.pdf [file supp_gkv653_nar-00868-x-2015-File012.pdf]
